# Supplementary material for: Characterization and Function Analysis of miRNA Editing during Fat Deposition in Chinese Indigenous Ningxiang Pigs
Source: MDPI journal article supplement (doi:10.3390/vetsci11040183), 2024-04-22
Supplement: s1 [file s1]

A

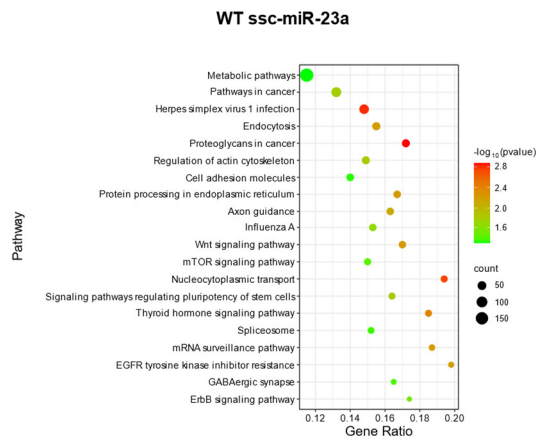

ET ssc-miR-23a

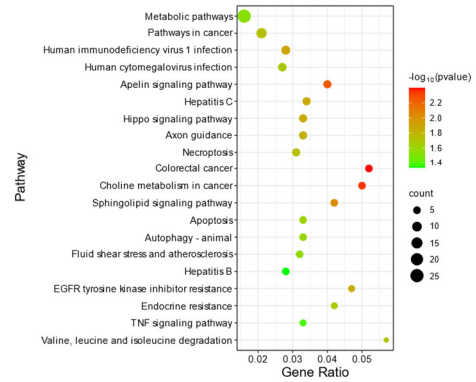

B

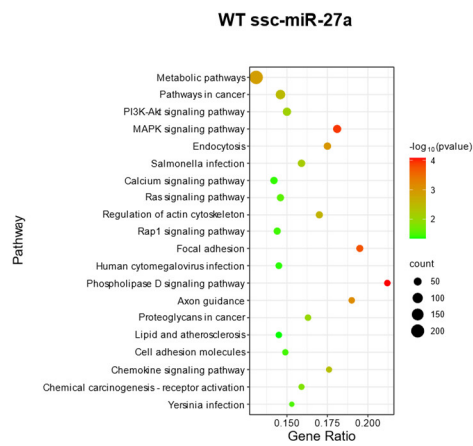

ET ssc-miR-27a

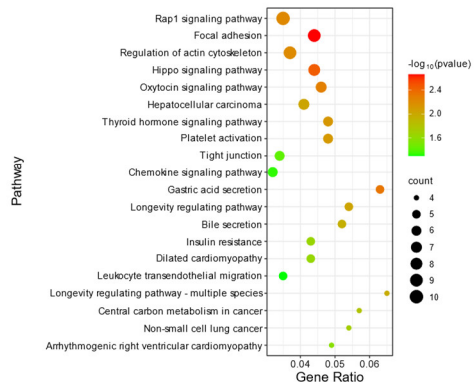

C

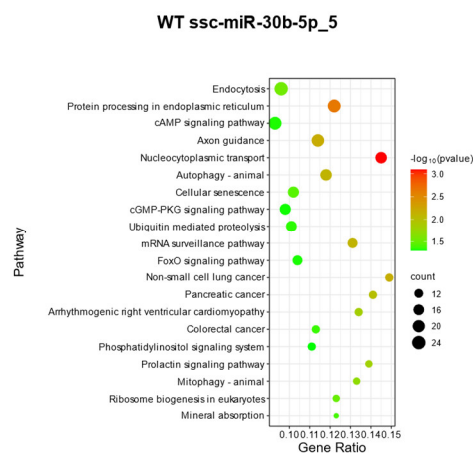

ET ssc-miR-30b-5p\_5

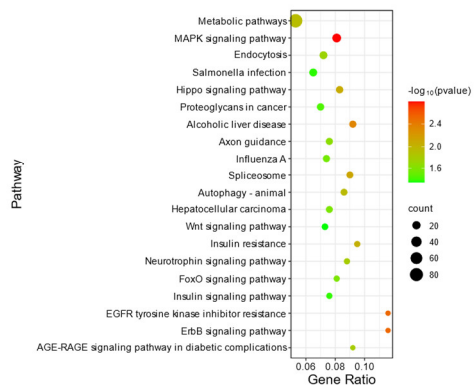

D

WT ssc-miR-30b-5p\_6

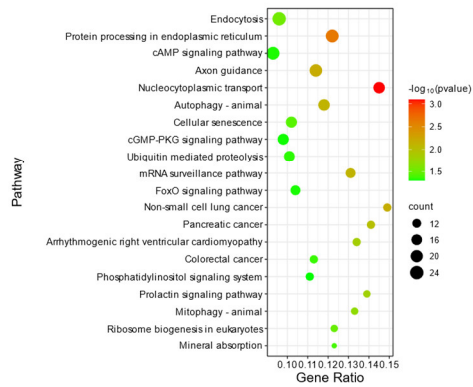

ET ssc-miR-30b-5p\_6

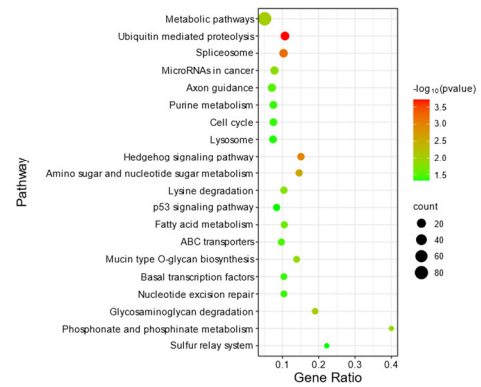

E

WT ssc-miR-15a

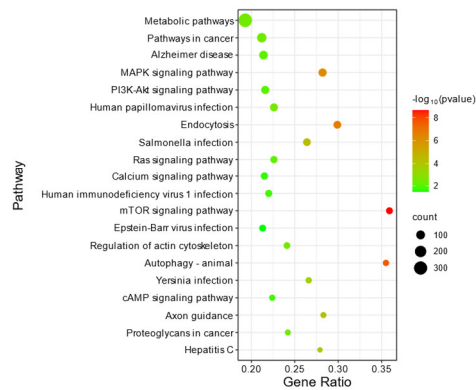

ET ssc-miR-15a

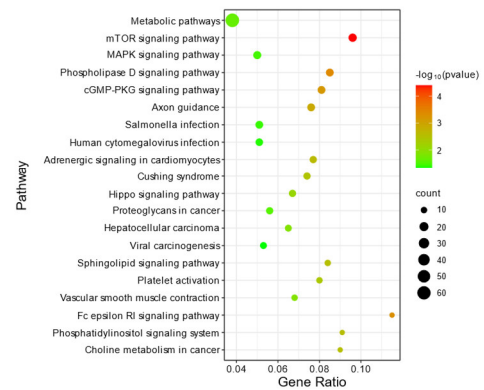

F

WT ssc-miR-497\_2

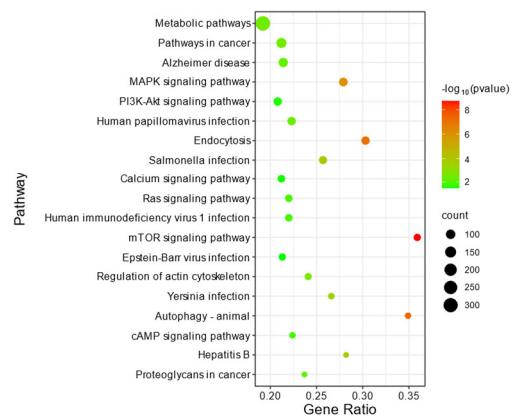

ET ssc-miR-497\_2

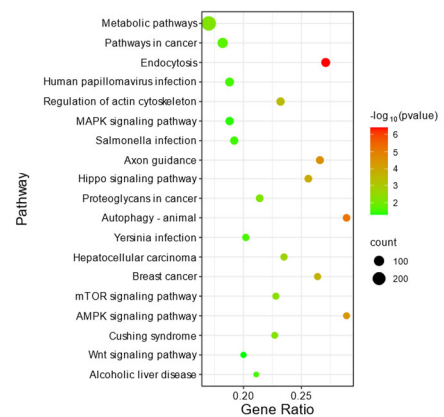

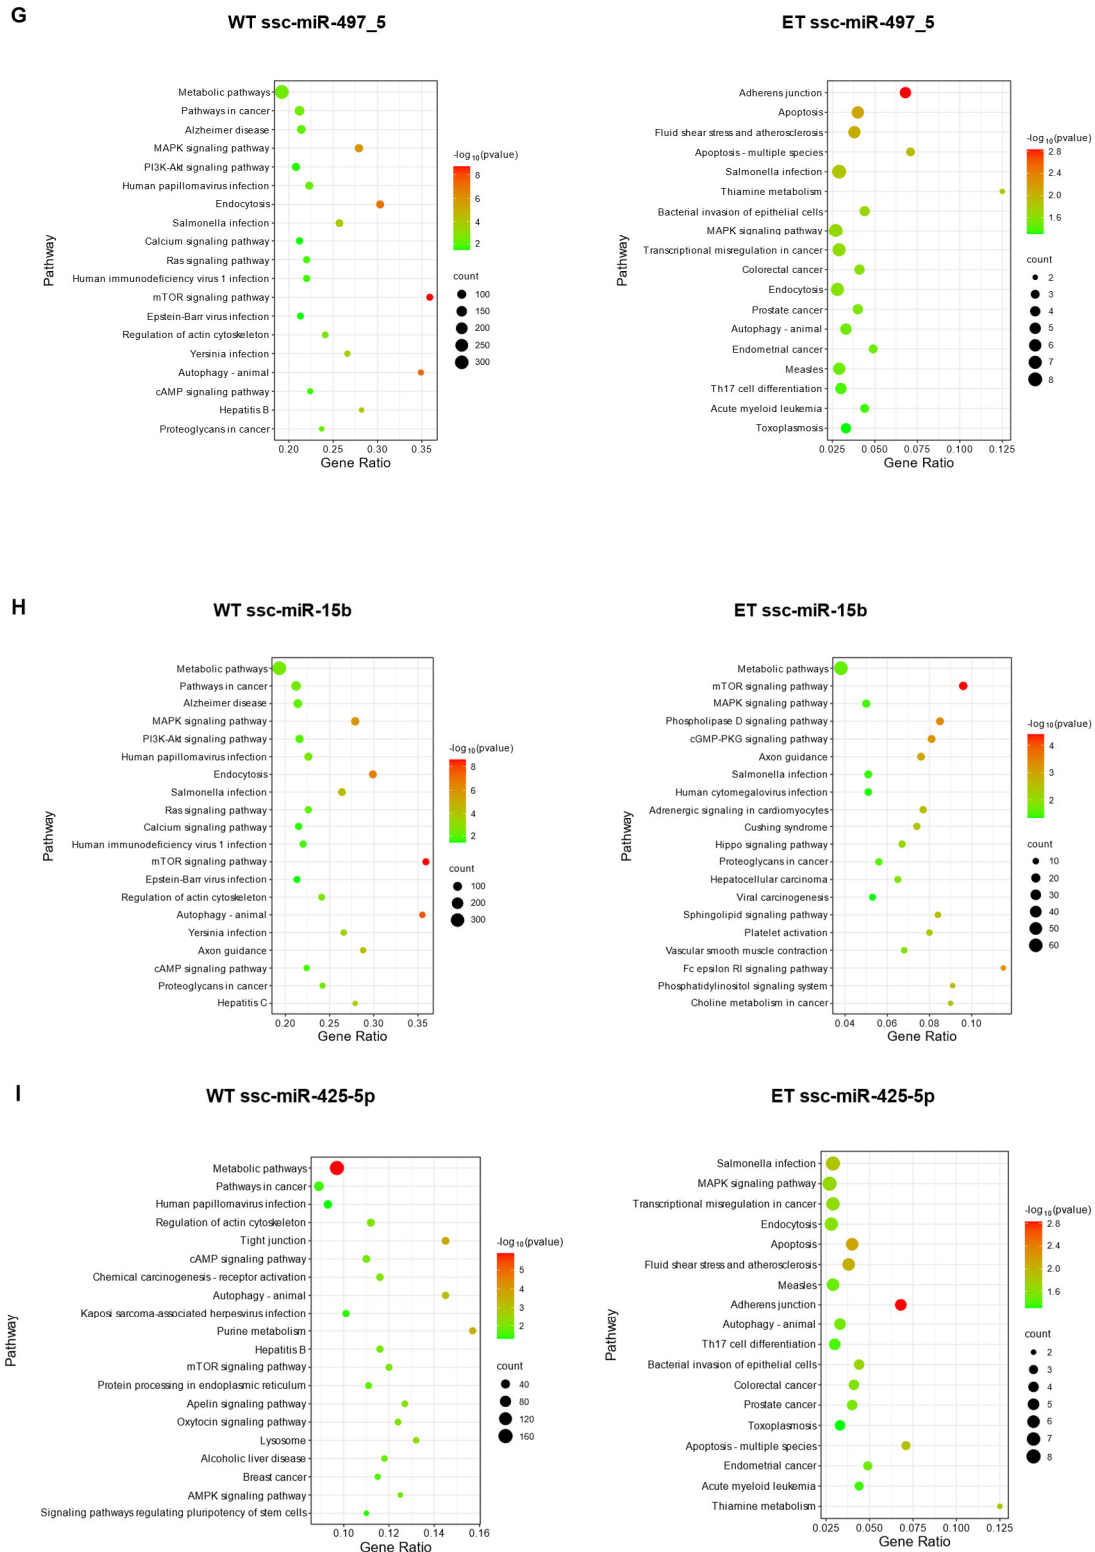

Figure S1: KEGG enrichment analysis results of WT and ET miRNAs target genes. ssc-miR-23a (A), ssc-miR-27a (B), ssc-miR-30b-5p\_5 (C), ssc-miR-30b-5p\_6 (D), ssc-miR-15a (E), ssc-miR-497\_2 (F); ssc-miR-497\_5 (G), ssc-miR-15b (H), ssc-miR-425-5p (I).
